# Supplementary material
Source: publisher figshare collection journal article supplement (https://acs.figshare.com/ndownloader/files/9052927)
Supplement: Supplementary file 1 [file 9052927]

# **EMIMBF<sub>4</sub> Assisted SnO<sub>2</sub>-Based Planer Perovskite Films for Label-Free Photoelectrochemical Sensing**

Jianying Pei<sup>1</sup>, Yiping Wu<sup>\*,1</sup>, Xiaoyu Guo<sup>1</sup>, Ye Ying<sup>1</sup>, Ying Wen<sup>1</sup>, Haifeng Yang<sup>\*,1</sup>

1. Department of Chemistry, Key Laboratory of Resource Chemistry of Ministry of Education, Shanghai Key Laboratory of Rare Earth Functional Materials, Shanghai Normal University, 100 Guilin Road, Shanghai 200234, China

\* Corresponding author

E-mail address: [hfyang@shnu.edu.cn](mailto:hfyang@shnu.edu.cn), [yipingwu@shnu.edu.cn](mailto:yipingwu@shnu.edu.cn)

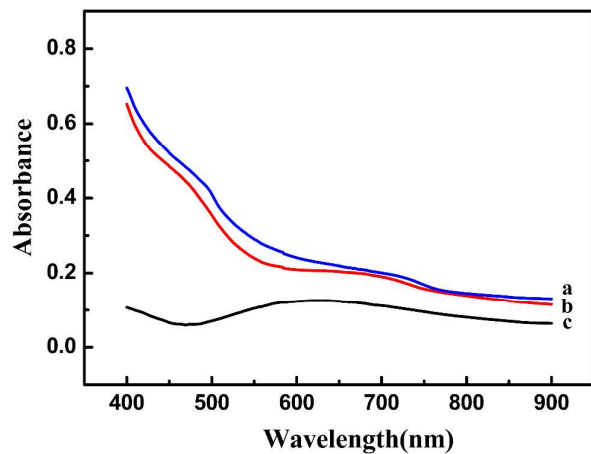

**Figure S1.** The absorption spectra recorded from (a) freshly prepared perovskite films, (b) the perovskite films stored under ambient condition for 10 days, (c) only SnO<sub>2</sub> layer.

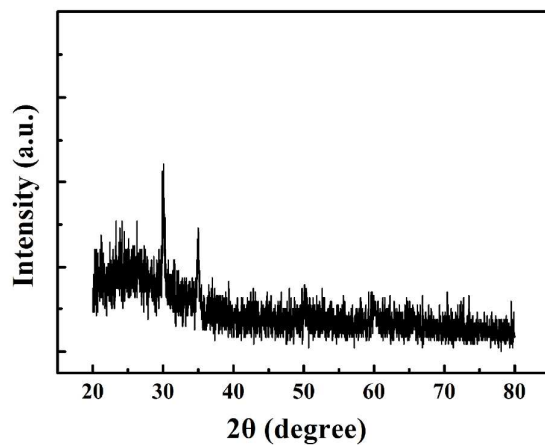

**Figure S2.** X-ray diffraction spectra of SnO<sub>2</sub> nanoparticles layer

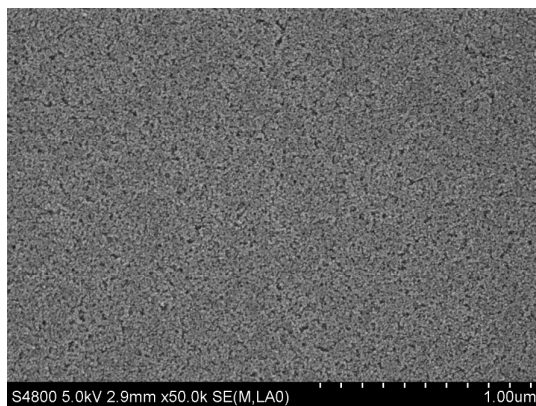

**Figure S3.** SEM image of SnO<sub>2</sub> nanoparticles layer spin-coated on bare ITO

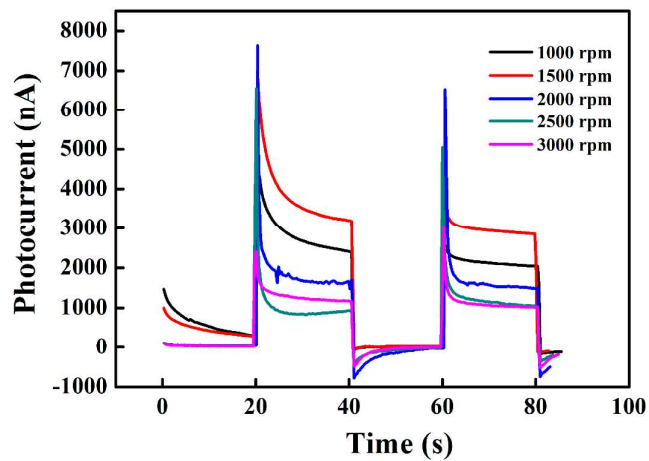

**Figure S4.** The photocurrent response of different thickness of the perovskite films. Measurement was performed in EMIMBF<sub>4</sub> solution.
